# Supplementary material for: Fluorescently labelled thioacetazone for detecting the interaction with Mycobacterium dehydratases HadAB and HadBC
Source: Royal Society of Chemistry journal article supplement (doi:10.1039/d1ob02080c), 2022-01-01
Supplement: d1ob02080c1.pdf [file d1ob02080c1.pdf]

## Supporting information

### Fluorescently Labeled Thioacetazone for Detecting the Interaction with *Mycobacterium* Dehydratases HadAB and HadBC

Bina K. Singh<sup>#a</sup>, Monisha Singha<sup>#b</sup>, Shyam Basak<sup>\*b</sup>, Rupam Biswas<sup>c</sup>, Amit Das<sup>\*a,c</sup>, Amit Basak<sup>\*a,b,+</sup>

<sup>a</sup>School of Bioscience, <sup>b</sup>Department of Chemistry, <sup>c</sup>Department of Biotechnology  
Indian Institute of Technology Kharagpur 721302 India

# Equal contribution      \*Corresponding authors

<sup>+</sup>current address Division of Chemical Science, Indian Institute of Science Education and Research,  
Kolkata, India

#### Contents

- <sup>1</sup>H, <sup>13</sup>C, DEPT-135 NMR spectra of the synthesized compounds 2-4
- Purification profile of the proteins used in this study using Size Exclusion Chromatography 5-6
- HtdX docked with the TAC-probe 7
- Ligplot Analysis depicting the respective residues used in the study interacting with probe 8-10
- Estimated Docking results 11

# <sup>1</sup>H, <sup>13</sup>C, DEPT-135 NMR spectra of the synthesized compounds:

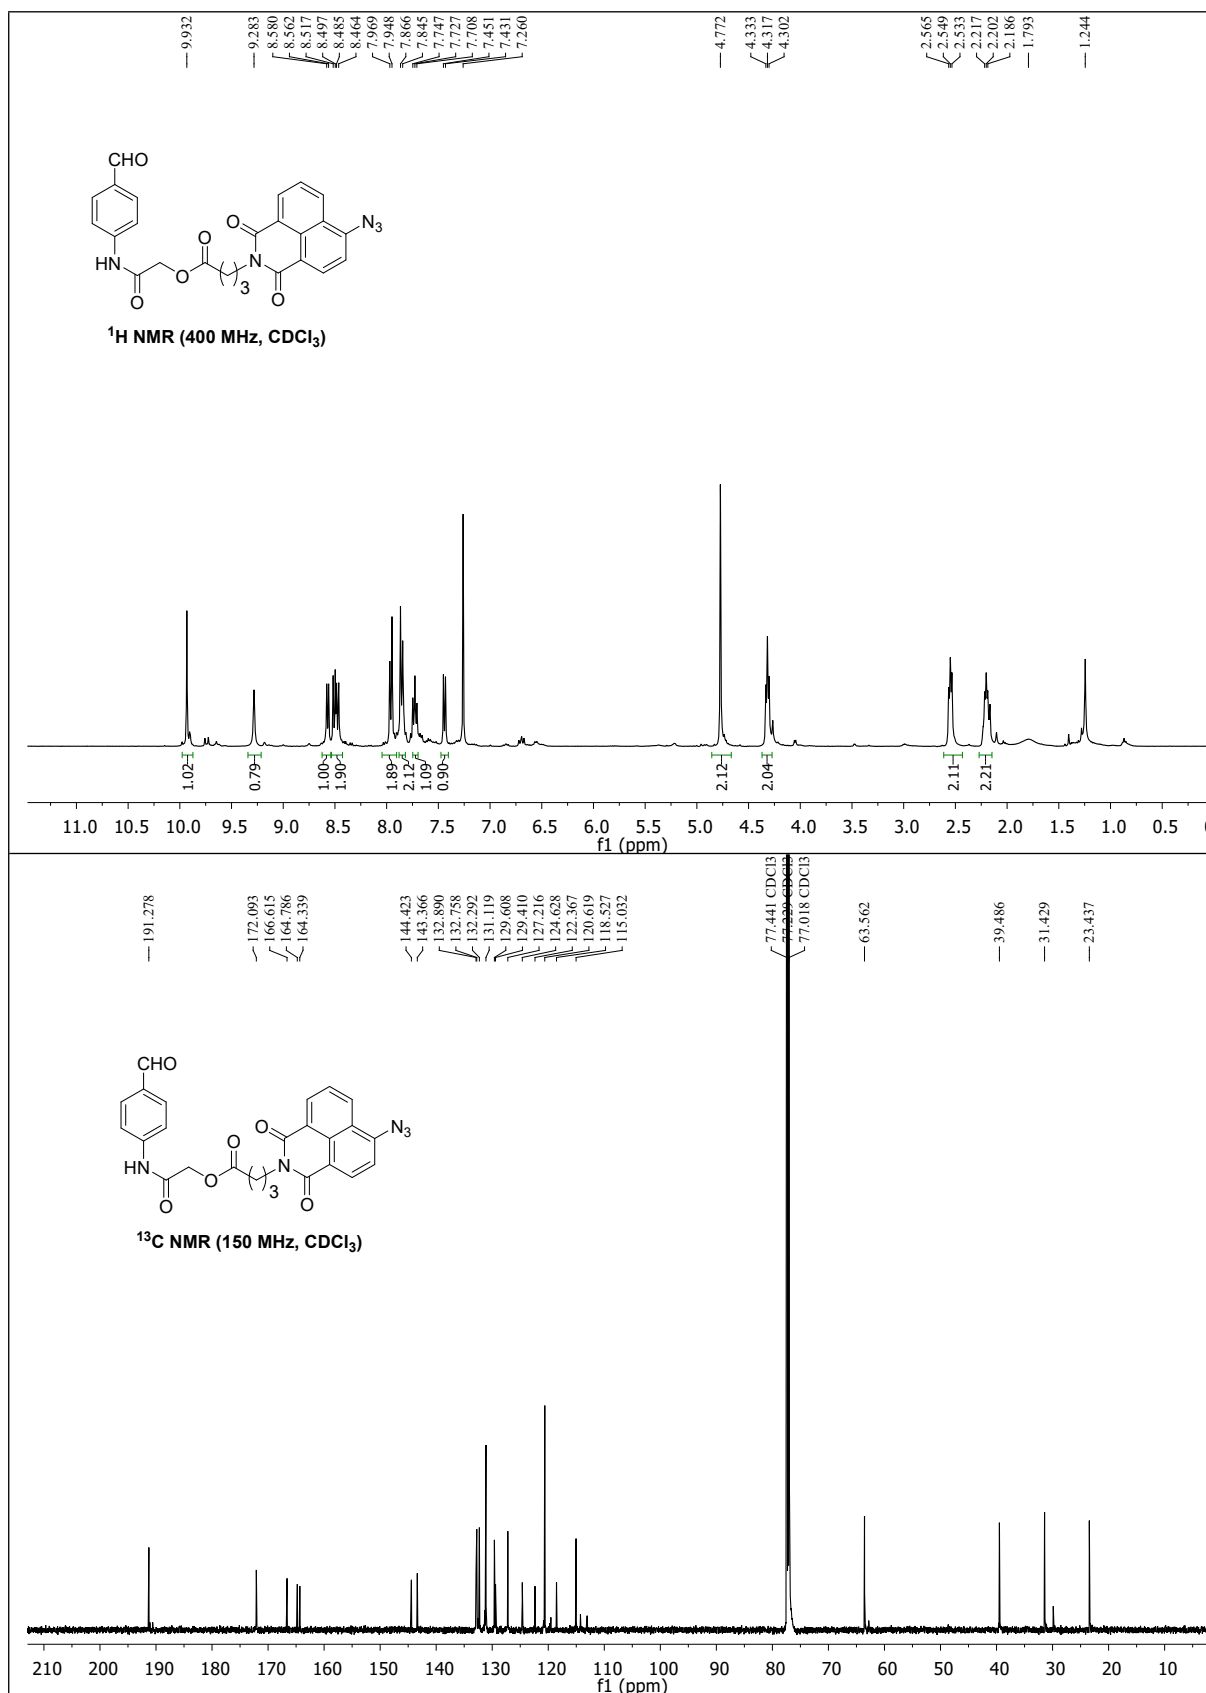

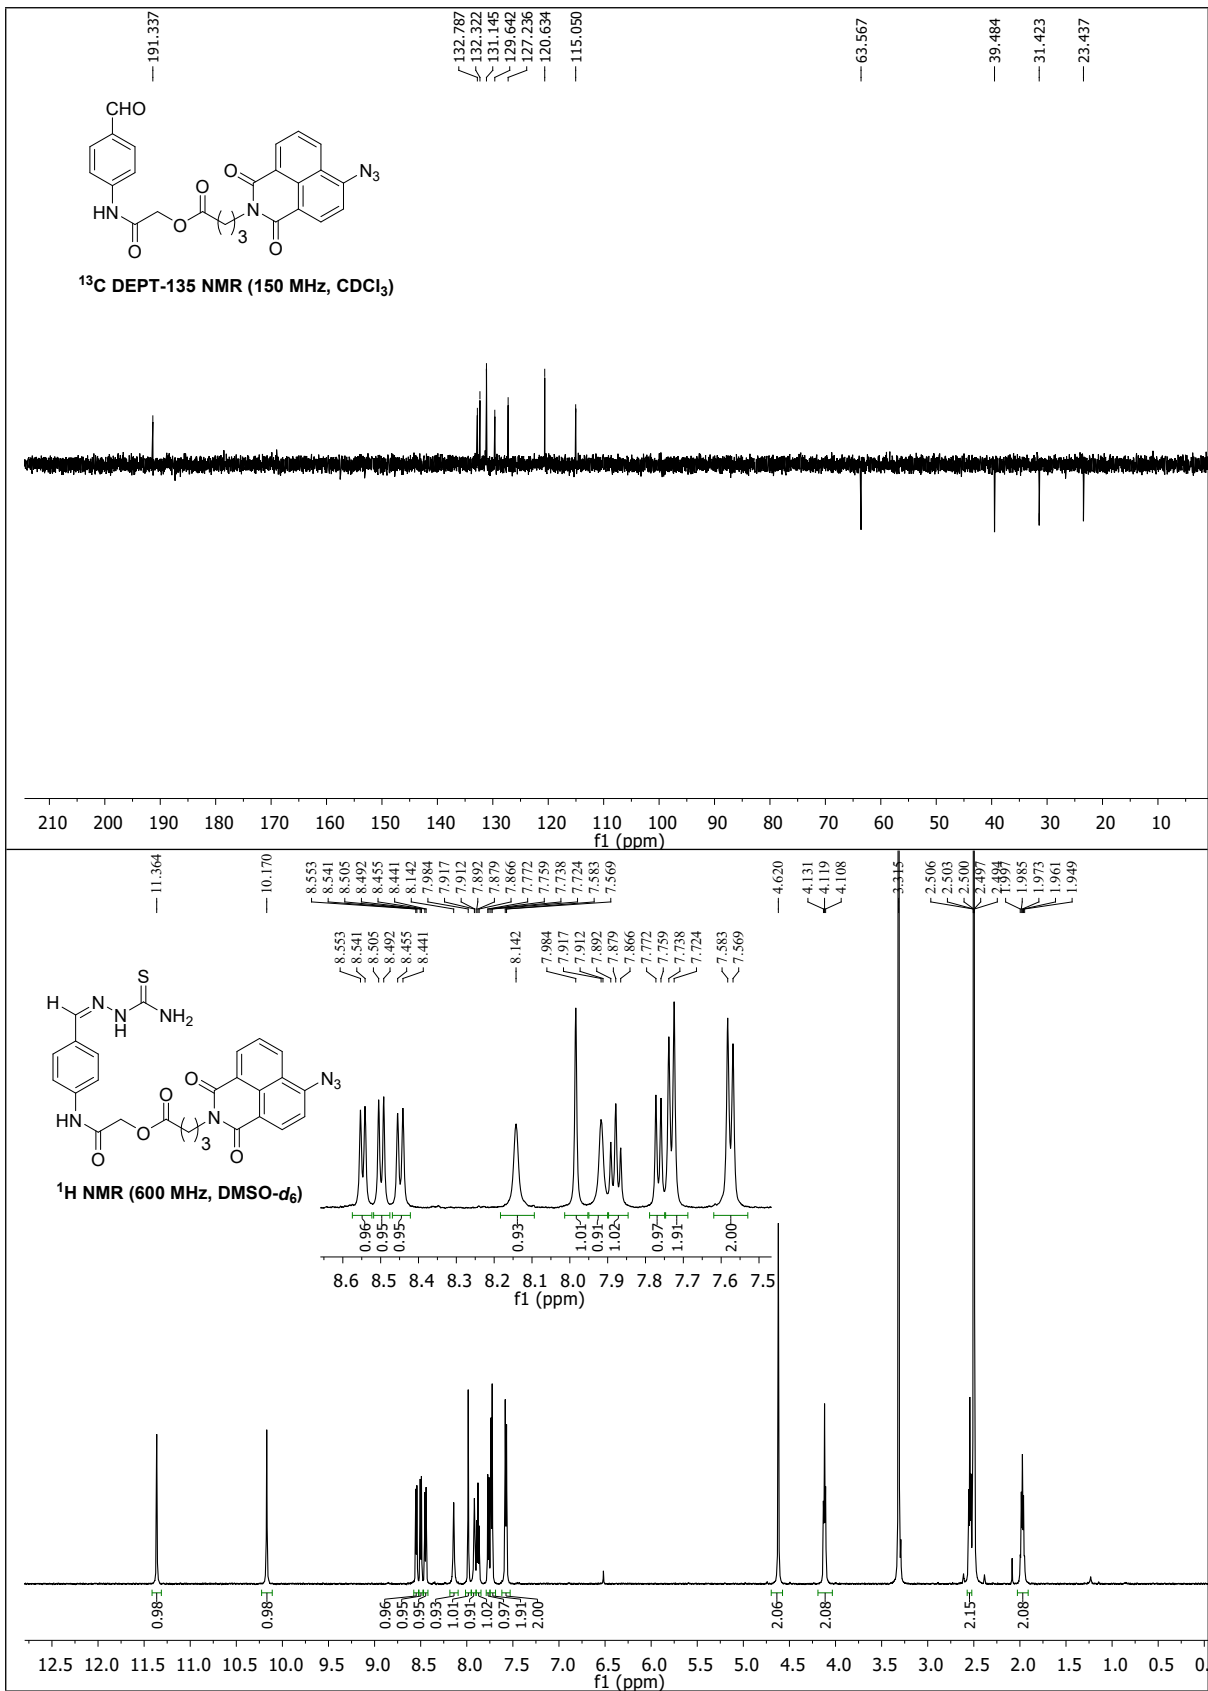

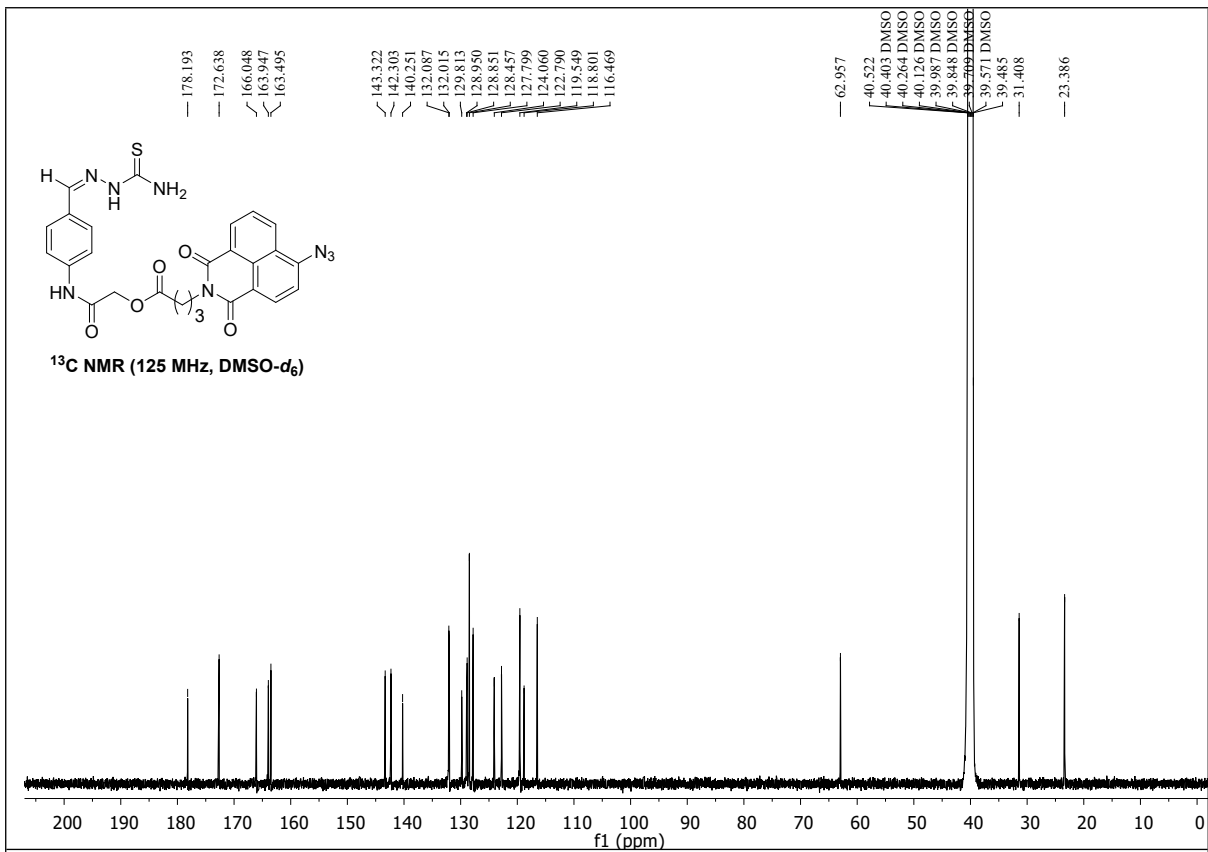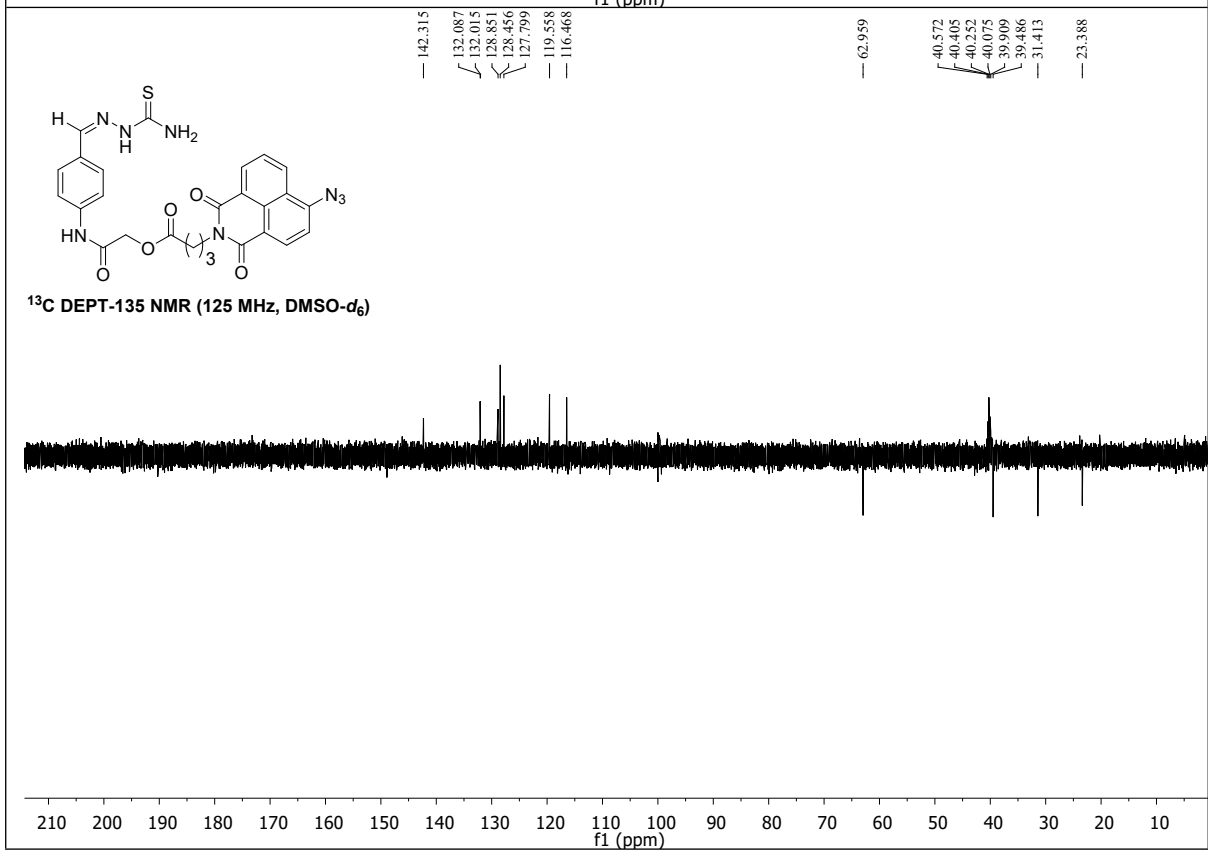

# Purification profile of the proteins used in this study using Size Exclusion Chromatography

## HadAB

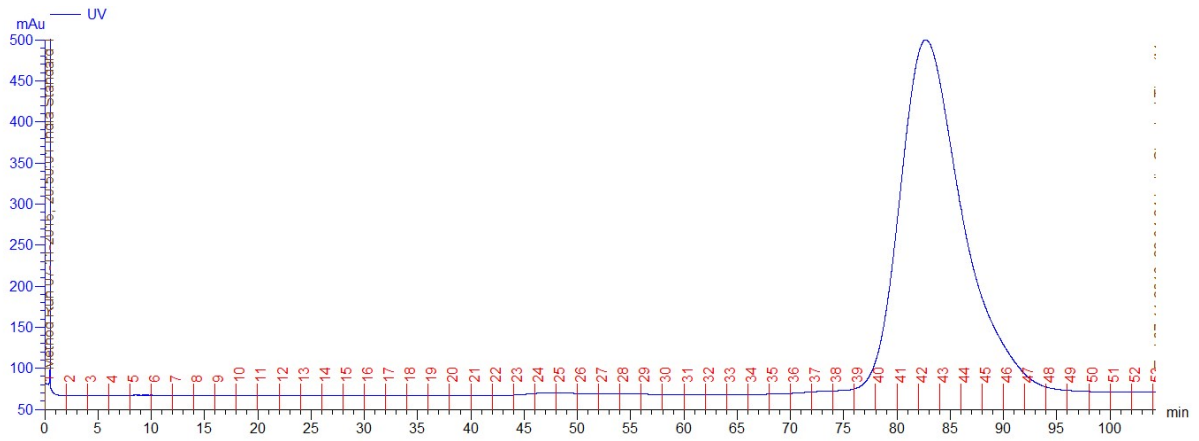

## HadBC

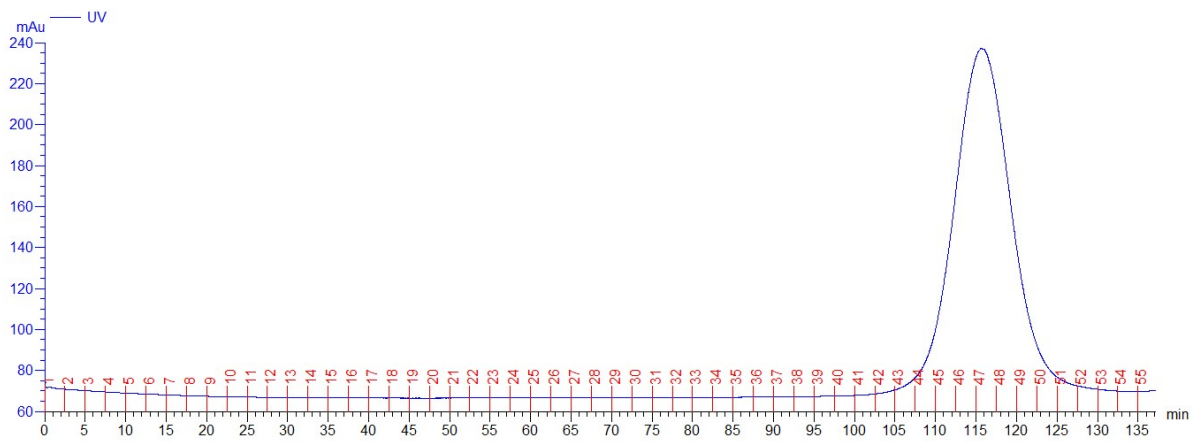

### EthA

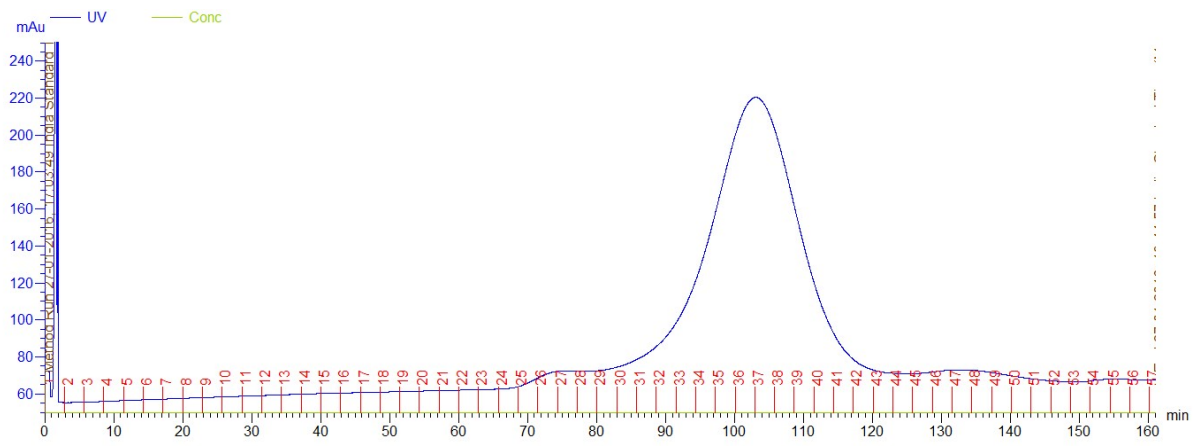

### MymA

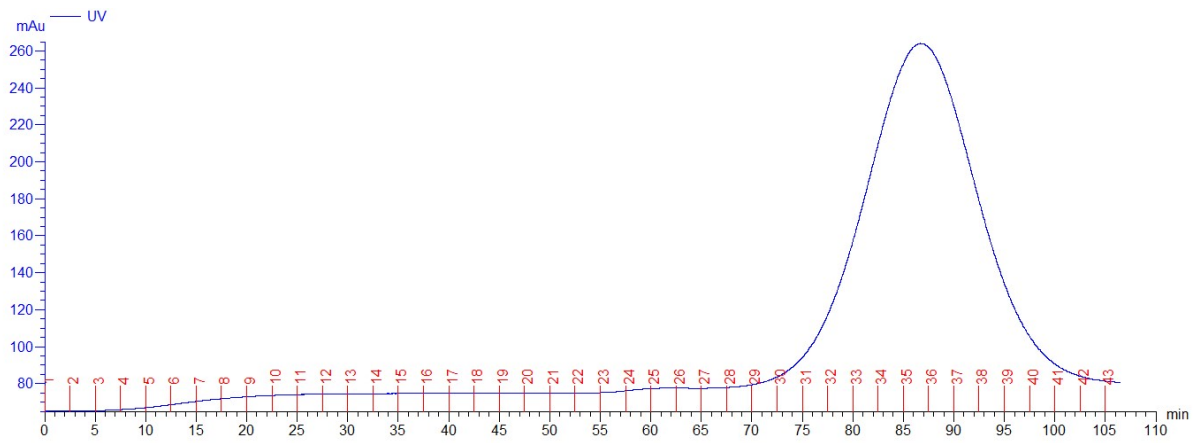

### HtdX

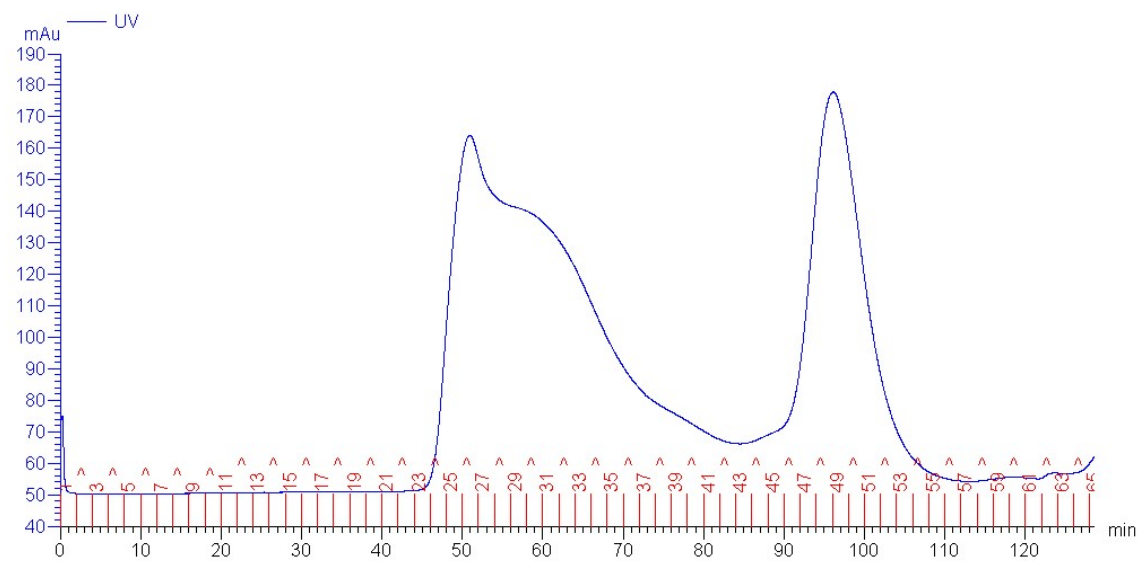

## Docking Pose

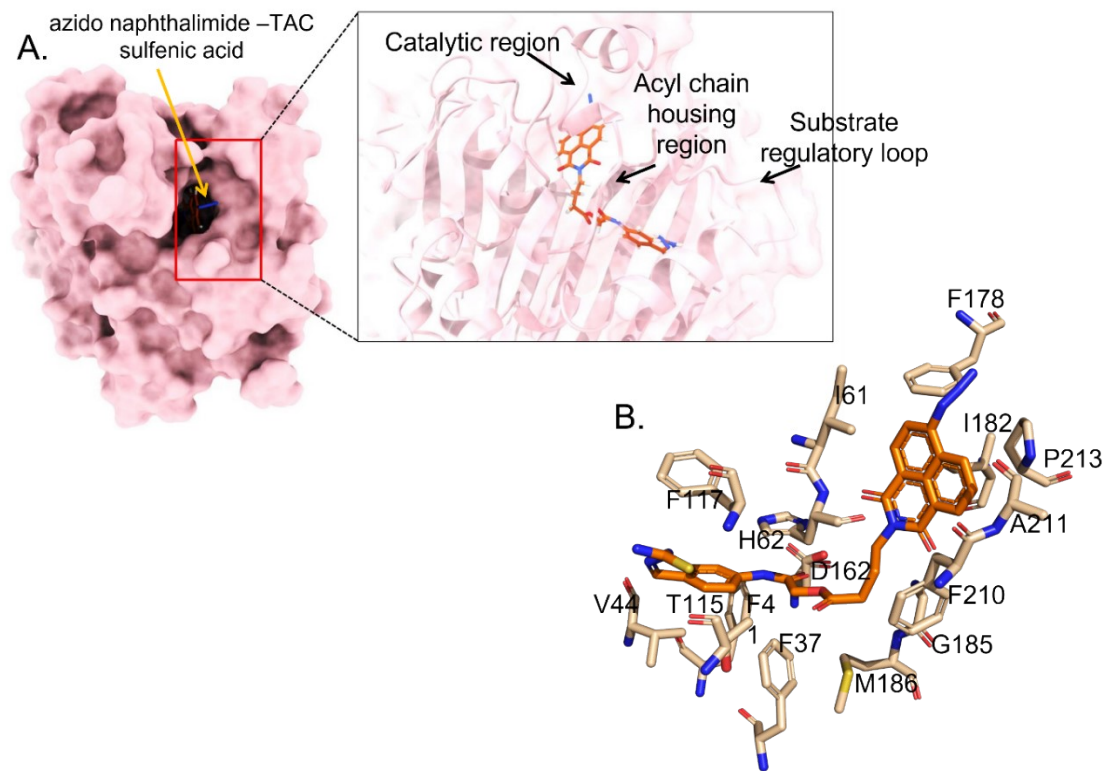

**HtdX docked with the TAC-probe.** (A) Surface representation image of HtdX depicts the docked TAC probe occupying its substrate binding pocket, (B) HtdX residues involved in interaction with the probe.

## Ligplot Analysis depicting the respective residues used in the study interacting with probe

### EthA-TAC probe

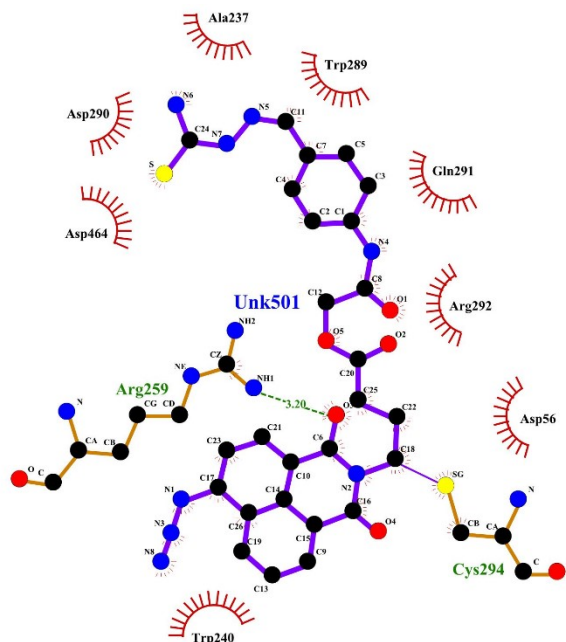

### MymA-TAC probe

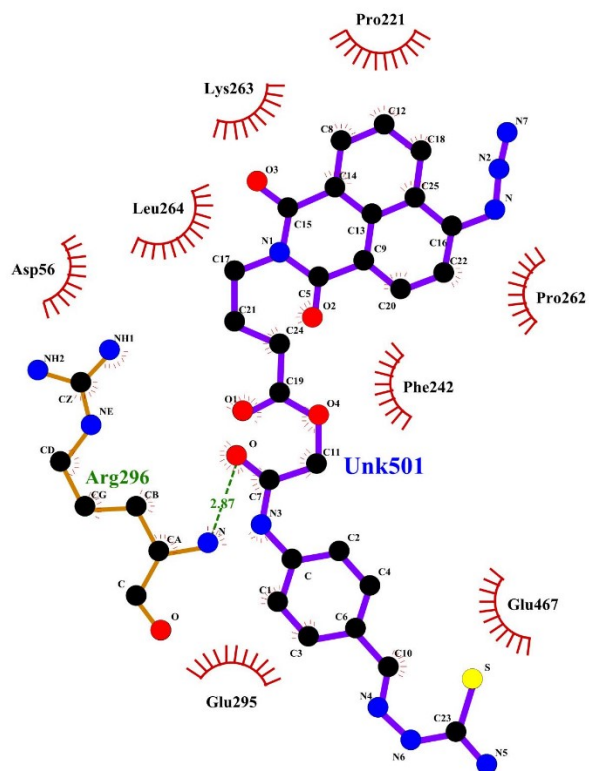



### HadAB-TAC sulfenic acid probe

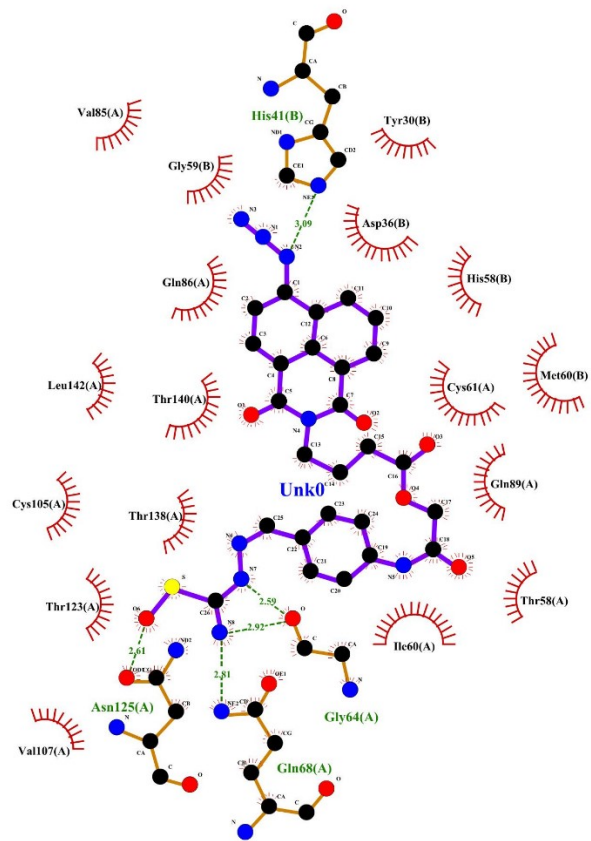

### HadBC-TAC sulfenic acid probe

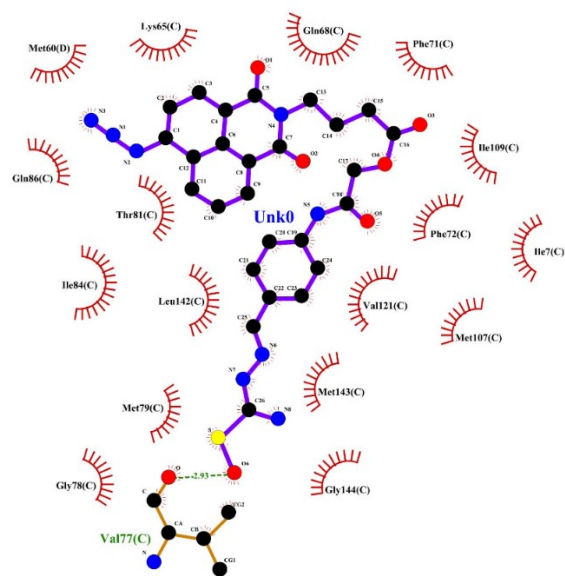

# HtdX-TAC probe

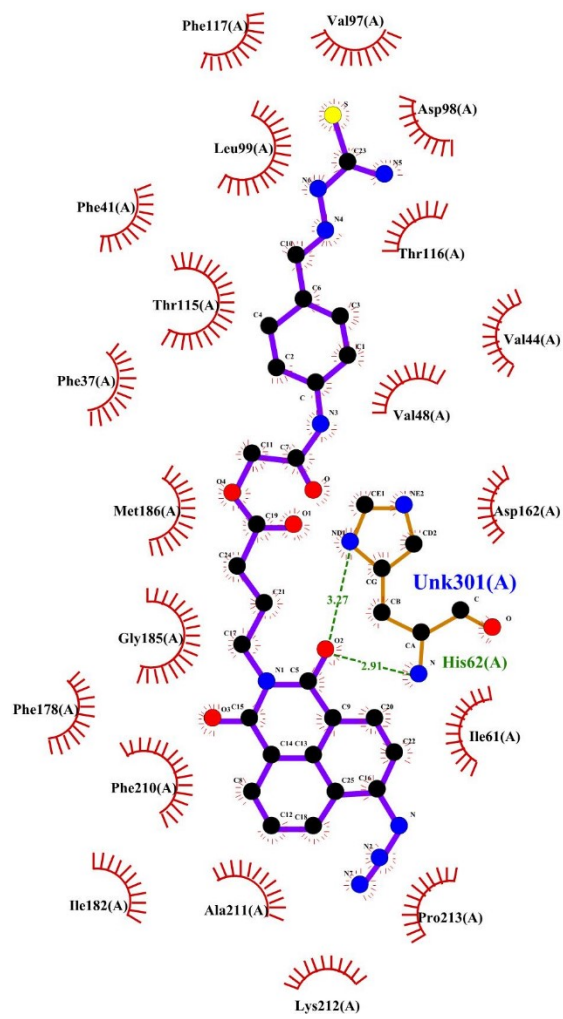

## Estimated Docking Results

**Table 1**

| <b>S.no</b> | <b>Protein</b> | <b>Estimated free energy<br/>of binding</b> | <b>Estimated Inhibition constant<br/>(Ki)</b> |
|-------------|----------------|---------------------------------------------|-----------------------------------------------|
| <b>1.</b>   | <b>HadAB</b>   | <b>-8.80 kcal/mol</b>                       | <b>0.35 <math>\mu</math>M</b>                 |
| <b>2.</b>   | <b>HadBC</b>   | <b>-8.27 kcal/mol</b>                       | <b>0.86 <math>\mu</math>M</b>                 |
| <b>3.</b>   | <b>HtdX</b>    | <b>-10.64 kcal/mol</b>                      | <b>1.50 <math>\mu</math>M</b>                 |
| <b>4.</b>   | <b>EthA</b>    | <b>-11.39 kcal/mol</b>                      | <b>5.18 <math>\mu</math>M</b>                 |
| <b>5.</b>   | <b>MymA</b>    | <b>-10.6 kcal/mol</b>                       | <b>7.36 <math>\mu</math>M</b>                 |
